# Supplementary material for: Stigma towards Mental Disorders among Nursing Students and Professionals: A Bibliometric Analysis
Source: MDPI journal article supplement (doi:10.3390/ijerph19031839), 2022-02-06
Supplement: s1 [file s1]

**Table S1: Complementary information on the retrieved articles**

| Authors                  | Title                                                                                               | Source                                                     | Language | Study Tipe    | First author institution                                                                              | Country      | †GBD Regions                 | ††Categorization SDI |
|--------------------------|-----------------------------------------------------------------------------------------------------|------------------------------------------------------------|----------|---------------|-------------------------------------------------------------------------------------------------------|--------------|------------------------------|----------------------|
| (Abasiubong et al, 2007) | A comparative study of attitude to mental illness between journalists and nurses in Uyo, Nigeria.   | African journal of medicine and medical sciences           | English  | Observational | University of Uyo. Department of Psychiatry, Faculty of Clinical Sciences, College of Health Sciences | Nigeria      | Western sub-Saharan Africa   | Low-middle SDI       |
| (Abuhamma d et al, 2019) | Correlates and Predictors of Stigmatization of Patients With Mental Illness Among Nursing Students  | Journal of psychosocial nursing and mental health services | English  | Observational | Jordan University of Science and Technology. Department of Maternal and Child Health                  | Jordan       | North Africa and Middle East | Middle SDI           |
| (Al-Awadhi et al, 2017)  | Nurses' Attitude Towards Patients with Mental Illness in a General Hospital in Kuwait               | Saudi journal of medicine & medical sciences               | English  | Observational | Mubarak Al-Kabeer Hospital. Department of Emergency Medicine                                          | Kuwait       | North Africa and Middle East | Middle SDI           |
| (Alyousef et al, 2019)   | Perceptions of Media's Contribution Toward Stigmatization of Mental Health by Saudi Arabian Nurses. | Journal of the American Psychiatric Nurses Association     | English  | Observational | King Saud University. Seham Mansour Alyousef, PhD                                                     | Saudi Arabia | North Africa and Middle East | Middle SDI           |
| (Anandan et al, 2016)    | Nursing attitudes towards people with comorbid substance abuse: a brief review of literature.       | Australian nursing & midwifery journal                     | English  | Review        | Monash University                                                                                     | Australia    | Australasia                  | High SDI             |
| (Arbanas et al, 2018)    | Impact of a Nursing in Psychiatry Course on Students' Attitudes Toward Mental Health Disorders      | Journal of psychosocial nursing and mental health services | English  | Intervention  | University Psychiatric Hospital Vrapce                                                                | Croatia      | Central Europe               | High-middle SDI      |

|                               |                                                                                                                      |                                                     |            |               |                                                                        |                      |                              |            |
|-------------------------------|----------------------------------------------------------------------------------------------------------------------|-----------------------------------------------------|------------|---------------|------------------------------------------------------------------------|----------------------|------------------------------|------------|
| (Ashencaen Crabtree, 2003)    | Asylum blues: staff attitudes towards psychiatric nursing in Sarawak, East Malaysia.                                 | Journal of psychiatric and mental health nursing    | English    | Observational | Zayed University, College of Family Sciences                           | United Arab Emirates | North Africa and Middle East | Middle SDI |
| (Avanci et al, 2002)          | Autoritarismo e benevolência frente à doença mental: estudo com alunos ingressantes no curso de enfermagem           | Revista Latino-Americana de Enfermagem              | Portuguese | Observational | Prefeitura Municipal de Ribeirão Preto. Faculdade de educação São Luís | Brasil               | Tropical Latin America       | Middle SDI |
| (Ayuso Gutierrez et al, 1980) | A comparative study of the psychiatric nurse's attitudes toward mental patients.                                     | International journal of rehabilitation research.   | English    | Observational | Medical School, Hospital Clínico, Madrid                               | Spain                | Western Europe               | High SDI   |
| (Ayuso-Gutierrez et al, 1978) | Comparative-study of psychiatric nurses attitudes towards mental-patients                                            | International journal of social psychiatry          | English    | Observational | Medical School, Hospital Clínico, Madrid                               | Spain                | Western Europe               | High SDI   |
| (Bairan et al, 1989)          | Attitudes toward mental illness: does a psychiatric nursing course make a difference?                                | Archives of psychiatric nursing                     | English    | Observational | University Teknikal Malaysia Melaka                                    | Malaysia             | Southeast Asia               | Middle SDI |
| (Baker et al, 2005)           | Nursing attitudes towards acute mental health care: development of a measurement tool                                | Journal of advanced nursing                         | English    | Other         | University of Manchester. School of Nursing, Midwifery and Social Work | UK England           | Western Europe               | High SDI   |
| (Bennett et al, 2015)         | Attitudes towards mental illness of nursing students in a Baccalaureate programme in Jamaica: a questionnaire survey | Journal of psychiatric and mental health nursing    | English    | Observational | University of the West Indies. School of Nursing                       | Jamaica              | Caribbean                    | Middle SDI |
| (Bergman et al, 2010)         | Nurses attitudes and expectations toward psychiatric patients with multiple readmissions                             | Israel annals of psychiatry and related disciplines | English    | Observational | Jdc Malben, Dept Med Serv & Care Aged                                  | Israel               | Western Europe               | High SDI   |
| (Berner, 2008)                | Psychiatric nursing. Against stigmatization an herb has grown.                                                       | Krankenpflege. Soins infirmiers                     | English    | Observational | Private Clinic Wyss AG                                                 | Switzerland          | Western Europe               | High SDI   |

|                        |                                                                                                                                            |                                                  |         |               |                                                                                   |             |                              |            |
|------------------------|--------------------------------------------------------------------------------------------------------------------------------------------|--------------------------------------------------|---------|---------------|-----------------------------------------------------------------------------------|-------------|------------------------------|------------|
| (Bertram et al, 2005)  | Mental health nurses, promoters of inclusion or perpetrators of exclusion?                                                                 | Journal of psychiatric and mental health nursing | English | Observational | Nottinghamshire Healthcare NHS Trust                                              | UK, England | Western Europe               | High SDI   |
| (Bilge et al, 2017)    | The Effect of Short Films About Mental Health and Disorders on Preventing Stigmatization in Nursing Education                              | Archives of psychiatric nursing                  | English | Intervention  | Ege University, Nursing Faculty, Psychiatric and Mental Health Nursing Department | Turkey      | North Africa and Middle East | Middle SDI |
| (Bingham et al, 2018)  | Educational intervention to decrease stigmatizing attitudes of undergraduate nurses towards people with mental illness                     | International journal of mental health nursing   | English | Intervention  | Western Institute of Technology. Department of Nursing                            | New Zealand | Australasia                  | High SDI   |
| (Bjorkman et al, 2008) | Attitudes towards people with mental illness: a cross-sectional study among nursing staff in psychiatric and somatic care                  | Scandinavian journal of caring sciences          | English | Observational | Lund University. Department of Health Sciences, Division of Nursing               | Sweden      | Western Europe               | High SDI   |
| (Bocking et al, 2019)  | 'It is meant to be heart rather than head'; International perspectives of teaching from lived experience in mental health nursing programs | International journal of mental health nursing   | English | Observational | Australian National University, ANU Medical School                                | Australia   | Australasia                  | High SDI   |
| (Brady, 2003)          | Nurses' attitudes towards a patient who has a psychiatric history.                                                                         | Journal of advanced nursing                      | English | Observational | St. Vincent's Hospital School of Nursing                                          | USA         | High-income North America    | High SDI   |
| (Brinn, 2000)          | Patients with mental illness: general nurses' attitudes and expectations.                                                                  | Nursing standard                                 | English | Observational | Whitchurch Hospital                                                               | UK, Wales   | Western Europe               | High SDI   |
| (Burnard et al, 2006)  | Views of mental illness and mental health care in Thailand: a report of an ethnographic study                                              | Journal of psychiatric and mental health nursing | English | Observational | Cardiff University. School of Nursing and Midwifery Studies                       | UK, Wales   | Western Europe               | High SDI   |

|                         |                                                                                                                                                          |                                                            |         |               |                                                                                                                                                                   |             |                           |                 |
|-------------------------|----------------------------------------------------------------------------------------------------------------------------------------------------------|------------------------------------------------------------|---------|---------------|-------------------------------------------------------------------------------------------------------------------------------------------------------------------|-------------|---------------------------|-----------------|
| (Burns et al, 2017)     | What's wrong with John? a randomised controlled trial of Mental Health First Aid (MHFA) training with nursing students                                   | Bmc psychiatry                                             | English | Intervention  | Curtin University, School of Public Health                                                                                                                        | Australia   | Australasia               | High SDI        |
| (Byrne et al, 2014)     | Changing Nursing Student Attitudes to Consumer Participation in Mental Health Services: A Survey Study of Traditional and Lived Experience-led Education | Issues in mental health nursing                            | English | Intervention  | Central Queensland University. Institute for Health and Social Science Research, Centre for Mental Health Nursing Innovation and School of Nursing and Midwifery. | Australia   | Australasia               | High SDI        |
| (Callaghan et al, 1996) | The effect of a psychiatric secondment on Hong Kong chinese student nurses' attitudes to mental illness.                                                 | Journal of psychiatric and mental health nursing           | English | Observational | City University. Research Fellow, Department of Mental Health and Learning Disability Nursing                                                                     | UK, England | Western Europe            | High SDI        |
| (Callaghan et al, 1997) | Attitudes towards mental illness: Testing the contact hypothesis among Chinese student nurses in Hong Kong                                               | Journal of advanced nursing                                | English | Intervention  | Chinese University of Hong Kong. Department of Nursing                                                                                                            | Hong Kong   | East Asia                 | High-middle SDI |
| (Carroll, 2018)         | Destigmatizing mental illness an innovative evidence-based undergraduate curriculum                                                                      | Journal of psychosocial nursing and mental health services | English | Intervention  | Anna Maria Colleg                                                                                                                                                 | USA         | High-income North America | High SDI        |
| (Carvalho et al, 2017)  | Nursing students' depiction of mental disorder                                                                                                           | Journal of mental health training education and practice   | English | Observational | Escola Superior de Enfermagem do Porto                                                                                                                            | Portugal    | Western Europe            | High SDI        |

|                          |                                                                                                                                                   |                                                            |         |               |                                                                                                       |             |                           |          |
|--------------------------|---------------------------------------------------------------------------------------------------------------------------------------------------|------------------------------------------------------------|---------|---------------|-------------------------------------------------------------------------------------------------------|-------------|---------------------------|----------|
| (Cassel et al, 1970)     | Comparing opinions about mental illness for hospital attendants and practical nursing students                                                    | Nursing research                                           | English | Observational | University of British Columbia. School of Health and Exercise Sciences                                | Canada      | High-income North America | High SDI |
| (Chambers et al, 2004)   | Nurses' attitudes to mental illness: A comparison of a sample of nurses from five European countries                                              | International journal of nursing studies                   | English | Observational | University of London and Kingston University. Faculty of Health and Social Care Sciences, St George's | UK, England | Western Europe            | High SDI |
| (Chang et al, 2017)      | Stigma towards mental illness among medical and nursing students in Singapore: a cross-sectional study                                            | Bmj open                                                   | English | Observational | Research Division, Institute of Mental Health                                                         | Singapore   | High-income Asia Pacific  | High SDI |
| (Charleston et al, 2005) | Psychiatric nurses and undergraduate nursing students' perceptions of preceptorship in the mental health setting.                                 | The international journal of psychiatric nursing research  | English | Observational | University of Melbourne. Centre for Psychiatric Nursing Research and Practice School of Nursing       | Australia   | Australasia               | High SDI |
| (Chung et al, 2008)      | A Study on the Stigma held by Nursing College Students against Mental Illness and Mentally Ill Patients                                           | Korean Journal of Social Issues                            | Korean  | Observational | Dongshin University                                                                                   | South Korea | High-income Asia Pacific  | High SDI |
| (Creech, 1977)           | Changes in attitudes about mental-illness among nursing-students following a psychiatric affiliation                                              | Journal of psychosocial nursing and mental health services | English | Observational | Center of Excellence for Research on Returning War Veterans and the Central Texas Veterans Health     | USA         | High-income North America | High SDI |
| (Curtis, 2007)           | Working together: A joint initiative between academics and clinicians to prepare undergraduate nursing students to work in mental health settings | International journal of mental health nursing             | English | Intervention  | University of Wollongong. School of Nursing, Midwifery and Indigenous Health                          | Australia   | Australasia               | High SDI |

|                       |                                                                                                                                                                                      |                                          |         |               |                                                                                                                             |              |                           |          |
|-----------------------|--------------------------------------------------------------------------------------------------------------------------------------------------------------------------------------|------------------------------------------|---------|---------------|-----------------------------------------------------------------------------------------------------------------------------|--------------|---------------------------|----------|
| (de Jacq et al, 2016) | The Variability of Nursing Attitudes Toward Mental Illness: An Integrative Review                                                                                                    | Archives of psychiatric nursing          | English | Review        | Columbia University School of Nursing                                                                                       | USA          | High-income North America | High SDI |
| (Deans et al, 2006)   | Attitudes of registered psychiatric nurses towards patients diagnosed with borderline personality disorder.                                                                          | Contemporary nurse                       | English | Observational | University of Ballarat and Ballarat Health Services, Ballarat, and North West Health Care Network, Royal Melbourne Hospital | Australia    | Australasia               | High SDI |
| (Delaney, 2012)       | Psychiatric Mental Health Nurses: Stigma Issues We Fail to See                                                                                                                       | Archives of psychiatric nursing          | English | Observational | Rush College of Nursing, Department of Community Mental Health and Systems                                                  | USA          | High-income North America | High SDI |
| (Dickens et al, 2016) | Interventions to improve mental health nurses' skills, attitudes, and knowledge related to people with a diagnosis of borderline personality disorder: Systematic review             | International journal of nursing studies | English | Review        | Abertay University. Division of Mental Health Nursing and Counselling                                                       | UK, England  | Western Europe            | High SDI |
| (Dickens et al, 2019) | Mixed-methods evaluation of an educational intervention to change mental health nurses' attitudes to people diagnosed with borderline personality disorder                           | Journal of clinical nursing              | English | Intervention  | Abertay University. School of Health and Social Sciences                                                                    | UK, Scotland | Western Europe            | High SDI |
| (Dickens et al, 2019) | Mental health nurses' attitudes, behaviour, experience and knowledge regarding adults with a diagnosis of borderline personality disorder: systematic, integrative literature review | Journal of clinical nursing              | English | Review        | Abertay University. Division of Mental Health Nursing and Counselling                                                       | UK, Scotland | Western Europe            | High SDI |

|                        |                                                                                                                                                                                                      |                                                                               |         |               |                                                                                                                       |           |                              |            |
|------------------------|------------------------------------------------------------------------------------------------------------------------------------------------------------------------------------------------------|-------------------------------------------------------------------------------|---------|---------------|-----------------------------------------------------------------------------------------------------------------------|-----------|------------------------------|------------|
| (Dickens et al, 2019)  | Mental health nurses' attitudes, experience, and knowledge regarding routine physical healthcare: systematic, integrative review of studies involving 7,549 nurses working in mental health settings | Bmc nursing                                                                   | English | Review        | Western Sydney University.Centre for Applied Nursing Research (CANR)                                                  | Australia | Australasia                  | High SDI   |
| (Dixon, 2003)          | A nursing student's impression of mental illness.                                                                                                                                                    | Journal of psychiatric and mental health nursing                              | English | Observational | Khoy University of Medical Sciences. Department of Medical-Surgical Nursing, School of Nursing,                       | Iran      | North Africa and Middle East | Middle SDI |
| (Douglas et al, 2018)  | Nurses' perception of preparedness for moving mental health care from psychiatric to general hospitals in Jamaica.                                                                                   | Revista panamericana de salud publica = Pan American journal of public health | English | Observational | University of the West Indies Mona Campus. Department of Community Health and Psychiatry, Faculty of Medical Sciences | Jamaica   | Caribbean                    | Middle SDI |
| (Duman et al, 2017)    | Effects of two different psychiatric nursing courses on nursing students' attitudes towards mental illness, perceptions of psychiatric nursing, and career choices                                   | Journal of professional nursing                                               | English | Intervention  | Dokuz Eylul University. Faculty of Nursing, Psychiatric Nursing Department                                            | Turkey    | North Africa and Middle East | Middle SDI |
| (Ebrahimi et al, 2017) | Comparing Mental Illness Stigma among Nurses in Psychiatric and Non-Psychiatric Wards in Tabriz University of Medical Sciences                                                                       | Acta facultatis medicae naissensis                                            | English | Observational | Tabriz University of Medical Sciences. Department of Psychiatric Nursing, Nursing and Midwifery Faculty               | Iran      | North Africa and Middle East | Middle SDI |
| (Eisenmar, 1972)       | Creativity in student nurses and their attitudes toward mental-illness and physical disability                                                                                                       | Journal of clinical psychology                                                | English | Other         | University of Texas                                                                                                   | USA       | High-income North America    | High SDI   |

|                            |                                                                                                                                                                                              |                                                             |         |               |                                                                                 |           |                           |          |
|----------------------------|----------------------------------------------------------------------------------------------------------------------------------------------------------------------------------------------|-------------------------------------------------------------|---------|---------------|---------------------------------------------------------------------------------|-----------|---------------------------|----------|
| (Enshi et al, 1978)        | The current problems of public health nurses at Ishikawa Pref. Improved mental hygiene and public health nursing: a change in the attitude of a public health nurse toward mental patients]. | Hokenfu zasshi The Japanese journal for public health nurse | English | Observational | Graduate School of Biomedical Sciences. Department of Obstetrics and Gynecology | Japan     | High-income Asia Pacific  | High SDI |
| (Ewalds-Kvist et al, 2013) | Student nurses and the general population in Sweden: Trends in attitudes towards mental illness                                                                                              | Nordic journal of psychiatry                                | English | Observational | Stockholm University. Department of Psychology                                  | Sweden    | Western Europe            | High SDI |
| (Farley-Toombs, 2012)      | The Stigma of a Psychiatric Diagnosis: Prevalence, Implications and Nursing Interventions in Clinical Care Settings                                                                          | Critical care nursing clinics of north america              | English | Review        | Strong Memorial Hospital, Rochester                                             | USA       | High-income North America | High SDI |
| (Fernandes et al, 2019)    | Opinions on mental illness from the perspective of primary care nurses in Portugal.                                                                                                          | Revista gaucha de enfermagem                                | English | Observational | Universidade Fernando Pessoa (UFP), Escola Superior de Saúde. Porto             | Portugal  | Western Europe            | High SDI |
| (Fokuo et al, 2017)        | Decreasing the Stigma of Mental Illness Through a Student-Nurse Mentoring Program: A Qualitative Study                                                                                       | Community mental health journal                             | English | Intervention  | Illinois Institute of Technology                                                | USA       | High-income North America | High SDI |
| (Fokuo et al, 2019)        | Pilot of a consumer based anti-stigma mentorship program for nursing students                                                                                                                | Journal of public mental health                             | English | Intervention  | University of California. Department of Psychiatry                              | USA       | High-income North America | High SDI |
| (Foster et al, 2019)       | Undergraduate nursing students' stigma and recovery attitudes during mental health clinical placement: A pre/post-test survey study                                                          | International journal of mental health nursing              | English | Observational | Australian Catholic University, School of Nursing, Midwifery and Paramedicine   | Australia | Australasia               | High SDI |



|                                       |                                                                                                                                                          |                                                      |         |               |                                                                                                          |           |                                 |                 |
|---------------------------------------|----------------------------------------------------------------------------------------------------------------------------------------------------------|------------------------------------------------------|---------|---------------|----------------------------------------------------------------------------------------------------------|-----------|---------------------------------|-----------------|
| (FuentesOla<br>varría et al,<br>2019) | Change of attitude by Nursing<br>students towards mental illnesses<br>through experiential learning                                                      | Educación médica<br>superior                         | Spanish | Intervention  | Universidad Del Desarrollo,<br>Facultad de Medicina<br>Clínica Alemana                                   | Chile     | Southern Latin<br>America       | High-middle SDI |
| (Gandhi et<br>al, 2019 )              | Knowledge and perceptions of<br>Indian primary care nurses<br>towards mental illness                                                                     | Investigación y<br>Educación en<br>Enfermería        | English | Observational | Deemed University.<br>Department of Nursing,<br>National Institute of Mental<br>Health & Neurosciences   | India     | South Asia                      | Low-middle SDI  |
| (Gandhi et<br>al, 2019b)              | Knowledge and perceptions of<br>Indian primary care nurses<br>towards mental illness.                                                                    | Investigacion y<br>educacion en<br>enfermeria        | English | Observational | Deemed<br>University.Department of<br>Nursing, National Institute<br>of Mental Health &<br>Neurosciences | India     | South Asia                      | Low-middle SDI  |
| (Goodwin et<br>al, 2008)              | Psychiatric nurses' attitudes<br>toward consumer and carer<br>participation in care: part 2--<br>barriers to participation.                              | Policy, politics &<br>nursing practice               | English | Observational | Victoria University                                                                                      | Australia | Australasia                     | High SDI        |
| (Gouthro,<br>2009)                    | Recognizing and addressing the<br>stigma associated with mental<br>health nursing: a critical<br>perspective.                                            | Issues in mental<br>health nursing                   | English | Observational | University of Jordan.<br>Department of Community<br>Health Nursing, Faculty of<br>Nursing                | Jordan    | North Africa and<br>Middle East | Middle SDI      |
| (Granados-<br>Gamez et al,<br>2017)   | Attitudes and Beliefs of Nursing<br>Students Toward Mental<br>Disorder: The Significance of<br>Direct Experience With Patients                           | Perspectives in<br>psychiatric care                  | English | Observational | University of Almeria.<br>Faculty of Health Sciences                                                     | Spain     | Western Europe                  | High SDI        |
| (Gray et al,<br>2017)                 | What does mental health nursing<br>contribute to improving the<br>physical health of service users<br>with severe mental illness? A<br>thematic analysis | International journal<br>of mental health<br>nursing | English | Observational | Hamad Medical<br>Corporation, Doha                                                                       | Qatar     | North Africa and<br>Middle East | Middle SDI      |

|                              |                                                                                                                     |                                                            |         |               |                                                                                                     |             |                              |                |
|------------------------------|---------------------------------------------------------------------------------------------------------------------|------------------------------------------------------------|---------|---------------|-----------------------------------------------------------------------------------------------------|-------------|------------------------------|----------------|
| (Grover et al, 2019)         | Change in Attitude among Nursing Undergraduate Students Following One-Month Exposure in a Mental Healthcare Setting | Indian journal of psychology medicine                      | English | Observational | Institute of Human Behaviour and Allied Sciences. Department of Clinical Psychology                 | India       | South Asia                   | Low-middle SDI |
| (Haddad et al, 2007)         | District nursing staff and depression: A psychometric evaluation of Depression Attitude Questionnaire findings      | International journal of nursing studies                   | English | Observational | King's College London, Institute of Psychiatry. Section of Psychiatric Nursing                      | UK, England | Western Europe               | High SDI       |
| (Haddad et al, 2010)         | School nurses' involvement, attitudes and training needs for mental health work: a UK-wide cross-sectional study    | Journal of advanced nursing                                | English | Observational | Institute of Psychiatry at King's College London. Health Service and Population Research Department | UK, England | Western Europe               | High SDI       |
| (Halter, 2004)               | Stigma and help seeking related to depression: a study of nursing students.                                         | Journal of psychosocial nursing and mental health services | English | Observational | Malone College                                                                                      | USA         | High-income North America    | High SDI       |
| (Halter, 2008)               | Perceived characteristics of psychiatric nurses: Stigma by association                                              | Archives of psychiatric nursing                            | English | Observational | University of Akron, College of Nursing                                                             | USA         | High-income North America    | High SDI       |
| (Hamdan-Mansour et al, 2009) | Attitudes of Jordanian mental health nurses toward mental illness and patients with mental illness.                 | Issues in mental health nursing                            | English | Observational | University of Jordan. Department of Community Health Nursing, Faculty of Nursing,                   | Jordan      | North Africa and Middle East | Middle SDI     |
| (Hanzawa et al, 2012)        | Study of understanding the internalized stigma of schizophrenia in psychiatric nurses in Japan                      | Psychiatry and clinical neurosciences                      | English | Observational | Jichi Medical University. School of Nursing                                                         | Japan       | High-income Asia Pacific     | High SDI       |

|                        |                                                                                                                                                        |                                                  |         |               |                                                                                                                              |           |             |          |
|------------------------|--------------------------------------------------------------------------------------------------------------------------------------------------------|--------------------------------------------------|---------|---------------|------------------------------------------------------------------------------------------------------------------------------|-----------|-------------|----------|
| (Happell et al, 2007)  | Undergraduate nursing students' attitudes towards mental health nursing: Determining the influencing factors                                           | Contemporary nurse                               | English | Observational | Central Queensland University. Department of Nursing and Health Studies                                                      | Australia | Australasia | High SDI |
| (Happell et al, 2008)  | Developing more positive attitudes towards mental health nursing in undergraduate students: part 1 - does more theory help?                            | Journal of psychiatric and mental health nursing | English | Observational | Central Queensland University. Department of Health Innovation and CQU Healthy Communities                                   | Australia | Australasia | High SDI |
| (Happell et al, 2009a) | Nursing Students' Attitudes to Mental Health Nursing: Psychometric Properties of a Self-report Scale                                                   | Archives of psychiatric nursing                  | English | Observational | University Australia. Department of Health Innovation                                                                        | Australia | Australasia | High SDI |
| (Happell et al, 2014)  | Lived-experience participation in nurse education: Reducing stigma and enhancing popularity                                                            | International journal of mental health nursing   | English | Intervention  | Central Queensland University, Institute for Health and Social Science Research, Centre for Mental Health Nursing Innovation | Australia | Australasia | High SDI |
| (Happell et al, 2015)  | Lived experience in teaching mental health nursing: Issues of fear and power                                                                           | International journal of mental health nursing   | English | Observational | University of Canberra. Research Centre for Nursing and Midwifery Practice, Faculty and Health, and ACT Health,              | Australia | Australasia | High SDI |
| (Happell et al, 2018)  | Nursing Students' Attitudes Towards People Diagnosed with Mental Illness and Mental Health Nursing: An international Project from Europe and Australia | Issues in mental health nursing                  | English | Observational | University of Newcastle, School of Nursing and Midwifery                                                                     | Australia | Australasia | High SDI |

|                        |                                                                                                                                                                |                                                  |         |               |                                                                                               |           |             |          |
|------------------------|----------------------------------------------------------------------------------------------------------------------------------------------------------------|--------------------------------------------------|---------|---------------|-----------------------------------------------------------------------------------------------|-----------|-------------|----------|
| (Happell et al, 2019a) | Nursing student attitudes to people labelled with 'mental illness' and consumer participation: A survey-based analysis of findings and psychometric properties | Nurse education today                            | English | Observational | University of Newcastle, School of Nursing and Midwifery                                      | Australia | Australasia | High SDI |
| (Happell et al, 2019b) | Changing attitudes: The impact of Expert by Experience involvement in Mental Health Nursing Education: An international survey study                           | International journal of mental health nursing   | English | Observational | University of Newcastle, School of Nursing and Midwifery                                      | Australia | Australasia | High SDI |
| (Happell et al, 2019c) | 'There's more to a person than what's in front of you': Nursing students' experiences of consumer taught mental health education                               | International journal of mental health nursing   | English | Observational | University of Newcastle. School of Nursing and Midwifery,                                     | Australia | Australasia | High SDI |
| (Happell et al, 2019d) | I felt some prejudice in the back of my head: Nursing students' perspectives on learning about mental health from "Experts by Experience"                      | Journal of psychiatric and mental health nursing | English | Observational | University of Newcastle, School of Nursing and Midwifery                                      | Australia | Australasia | High SDI |
| (Happell, 2005)        | Mental Health Nursing: Challenging stigma and discrimination towards people experiencing a mental illness                                                      | International journal of mental health nursing   | English | Other         | University of Melbourne, School of Nursing                                                    | Australia | Australasia | High SDI |
| (Happell, 2008a)       | The importance of clinical experience for mental health nursing - Part 1: Undergraduate nursing students' attitudes, preparedness and satisfaction             | International journal of mental health nursing   | English | Observational | Central Queensland University. Contemporary Nursing, Department of Nursing and Health Studies | Australia | Australasia | High SDI |

|                            |                                                                                                                                                                           |                                                |         |               |                                                                                                                                                      |             |                |          |
|----------------------------|---------------------------------------------------------------------------------------------------------------------------------------------------------------------------|------------------------------------------------|---------|---------------|------------------------------------------------------------------------------------------------------------------------------------------------------|-------------|----------------|----------|
| (Happell, 2008b)           | The importance of clinical experience for mental health nursing - Part 2: Relationships between undergraduate nursing students' attitudes, preparedness, and satisfaction | International journal of mental health nursing | English | Observational | Central Queensland University. Department of Health Innovation and Centre for Social Science                                                         | Australia   | Australasia    | High SDI |
| (Happell, 2009b)           | Influencing undergraduate nursing students' attitudes toward mental health nursing: acknowledging the role of theory.                                                     | Issues in mental health nursing                | English | Observational | Central Queensland University                                                                                                                        | Australia   | Australasia    | High SDI |
| (Hayman-White et al, 2005) | Nursing students' attitudes toward mental health nursing and consumers: Psychometric properties of a self-report scale                                                    | Archives of psychiatric nursing                | English | Observational | University of Melbourne. School of Nursing, Faculty of Medicine, Dentistry and Health Sciences, Centre for Psychiatric Nursing Research and Practice | Australia   | Australasia    | High SDI |
| (Heim et al, 2019)         | Reducing mental health-related stigma among medical and nursing students in low- and middle-income countries: a systematic review.                                        | Epidemiology and psychiatric sciences          | English | Review        | University of Zurich. Department of Psychology                                                                                                       | Switzerland | Western Europe | High SDI |
| (Hellzen et al, 2018)      | Nurses' attitudes towards older residents with long-term schizophrenia                                                                                                    | Journal of advanced nursing                    | English | Observational | Mid-Sweden University. Department of Health and Caring Science,                                                                                      | Sweden      | Western Europe | High SDI |
| (Hogberg et al, 2008)      | Attitudes towards mental illness in Sweden: Adaptation and development of the Community Attitudes towards Mental Illness questionnaire                                    | International journal of mental health nursing | English | Observational | Karolinska Institute. Division of Psychiatry, Institution of Clinical Neuroscience                                                                   | Sweden      | Western Europe | High SDI |

|                                   |                                                                                                                                                                           |                                                  |         |               |                                                                            |             |                              |                 |
|-----------------------------------|---------------------------------------------------------------------------------------------------------------------------------------------------------------------------|--------------------------------------------------|---------|---------------|----------------------------------------------------------------------------|-------------|------------------------------|-----------------|
| (Hsiao et al, 2015)               | Factors influencing mental health nurses' attitudes towards people with mental illness                                                                                    | International journal of mental health nursing   | English | Observational | Chung Shan Medical University, School of Nursing, College of Medicineç     | Taiwan      | East Asia                    | High-middle SDI |
| (Hugo, 2001)                      | Mental health professionals' attitudes towards people who have experienced a mental health disorder.                                                                      | Journal of psychiatric and mental health nursing | English | Observational | North-western Adelaide Mental Health Service, Queen Elizabeth Hospital     | Australia   | Australasia                  | High SDI        |
| (Hunter et al, 2015)              | Nursing Students ' Attitudes about Psychiatric Mental Health Nursing                                                                                                      | Issues in mental health nursing                  | English | Observational | Kings College. Institute of Psychiatry                                     | UK, England | Western Europe               | High SDI        |
| (Ihalainen-Tamlander et al, 2016) | Stigmatizing attitudes in nurses towards people with mental illness: a cross-sectional study in primary settings in Finland                                               | Journal of psychiatric and mental health nursing | English | Observational | University of Turku. Department of Nursing Science                         | Finland     | Western Europe               | High SDI        |
| (Iheanacho et al, 2014)           | Attitudes Toward Mental Illness and Changes Associated with a Brief Educational Intervention for Medical and Nursing Students in Nigeria                                  | Academic psychiatry                              | English | Intervention  | Yale University School of Medicine                                         | USA         | High-income North America    | High SDI        |
| (Inan et al, 2019)                | The Impact of Mental Health Nursing Module, Clinical Practice and an Anti-Stigma Program on Nursing Students' Attitudes toward Mental Illness: A Quasi-Experimental Study | Journal of professional nursing                  | English | Intervention  | Dokuz Eylül University, Nursing Faculty, Department of Psychiatric Nursing | Turkey      | North Africa and Middle East | Middle SDI      |

|                             |                                                                                                                                                     |                                                                    |         |               |                                                                                         |              |                           |          |
|-----------------------------|-----------------------------------------------------------------------------------------------------------------------------------------------------|--------------------------------------------------------------------|---------|---------------|-----------------------------------------------------------------------------------------|--------------|---------------------------|----------|
| (Itzhaki et al, 2017)       | Nursing Students' Attitudes and Intention to Work with Mentally Ill Patients Before and After a Planned Intervention                                | Academic psychiatry                                                | English | Intervention  | Tel Aviv University                                                                     | Israel       | Western Europe            | High SDI |
| (James et al, 2007)         | Psychiatric nurses' knowledge, experience and attitudes towards clients with borderline personality disorder                                        | Journal of psychiatric and mental health nursing                   | English | Observational | Royal College of Surgeons in Ireland, and Youth Drug & Alcohol Service (YoDA), Tallaght | UK, Ireland  | Western Europe            | High SDI |
| (Jang Mi-yount et al, 2017) | Care Burden for Mental Illness Patients, Attitude toward Mental Illness and Psychiatric Nursing Competency in Non-psychiatric Nurses                | Journal of Korean Academy of Psychiatric and Mental Health Nursing | Korean  | Observational | Kyung Hee University. College of Nursing Science                                        | South Korea  | High-income Asia Pacific  | High SDI |
| (Jarvis, 2006)              | District nurses' involvement and attitudes to mental health problems: A three-area cross-sectional study.                                           | Journal of clinical nursing                                        | English | Other         | Inst Psychiat, Hlth Serv Res Dept, Sect Psychiat Nursing                                | UK, Scotland | Western Europe            | High SDI |
| (Julia-Sanchis et al, 2019) | The Spanish version of the Psychiatric/Mental health clinical placement survey and an assessment of Spanish student attitudes towards mental health | Journal of psychiatric and mental health nursing                   | English | Observational | University of Alicante. Nursing Department, Health Sciences Faculty                     | Spain        | Western Europe            | High SDI |
| (Kahn, 1976)                | Relationship between nurses' opinions about mental illness and experience.                                                                          | Nursing research                                                   | English | Observational | California State University                                                             | USA          | High-income North America | High SDI |
| (Katsuki et al, 2005)       | A study of emotional attitude of psychiatric nurses: Reliability and validity of the Nurse Attitude Scale                                           | International journal of menta health nursing                      | English | Observational | Niigata University. School of Health Sciences, Faculty of Medicine                      | Japan        | High-income Asia Pacific  | High SDI |

|                              |                                                                                                                                                       |                                                                                            |          |               |                                                                               |             |                              |            |
|------------------------------|-------------------------------------------------------------------------------------------------------------------------------------------------------|--------------------------------------------------------------------------------------------|----------|---------------|-------------------------------------------------------------------------------|-------------|------------------------------|------------|
| (Keane, 1991)                | Beliefs about mental illness in a culturally diverse nursing student population: implications for education and practice.                             | The Journal of the New York State Nurses' Association                                      | English  | Observational | City University of New York, City College School of Nursing                   | USA         | High-income North America    | High SDI   |
| (Khorasanizadeh et al, 2018) | A comparative survey of the attitudes of nurses, nursing students, and patients as to the observance of the patients' dignity in the psychiatric ward | Australasian medical journal                                                               | English  | Observational | Shahid Beheshti University of Medical Sciences. School of Nursing & Midwifery | Iran        | North Africa and Middle East | Middle SDI |
| (Kim et al, 1978)            | A study on knowledge and attitudes toward mental illness and psychiatric nursing needs of Korean people.                                              | Taehan kanho. The Korean nurse                                                             | Japanese | Observational | Yonsei University                                                             | South Korea | High-income Asia Pacific     | High SDI   |
| (Kim et al, 2016)            | The Prejudice towards the Mental Illness according to Clinical Practice Experience of Community Mental Health among Nursing Students                  | Asia-pacific Journal of Multimedia Services Convergent with Art, Humanities, and Sociology | Korean   | Observational | Busan Catholic University                                                     | South Korea | High-income Asia Pacific     | High SDI   |
| (Kirkpatrick, 2008)          | A narrative framework for understanding experiences of people with severe mental illnesses                                                            | archives of psychiatric nursing                                                            | English  | Observational | Hamilton and McMaster University. St. Joseph's Healthcare                     | Canada      | High-income North America    | High SDI   |
| (Koukia et al, 2013)         | Greek Mental Health Nurses' Practices and Attitudes in the Management of Acute Cases                                                                  | Issues in mental health nursing                                                            | English  | Observational | University of Athens, Faculty of Nursing                                      | Greece      | Western Europe               | High SDI   |
| (Kumakura et al, 1992)       | Attitude change towards mental illness during nursing education--a cross-cultural study of student nurses in Korea, Republic of                       | Asia-Pacific journal of public health                                                      | English  | Observational | Toho University. Department of Mental Health, School of Health Sciences       | Japan       | High-income Asia Pacific     | High SDI   |



China and Japan.

|                        |                                                                                                                                                         |                                                                                            |         |               |                                                                                           |             |                           |            |
|------------------------|---------------------------------------------------------------------------------------------------------------------------------------------------------|--------------------------------------------------------------------------------------------|---------|---------------|-------------------------------------------------------------------------------------------|-------------|---------------------------|------------|
| (Lee et al, 2018)      | The Attitudes toward Mental Illness in Nursing Students after Clinical Practice of Psychiatric Nursing                                                  | Asia-pacific Journal of Multimedia Services Convergent with Art, Humanities, and Sociology | Korean  | Intervention  | Department of Mental Health, School of Health Sciences, Tokyo University                  | South Korea | High-income Asia Pacific  | High SDI   |
| (Lethoba et al, 2006)  | How professional nurses in a general hospital setting perceive mentally ill patients.                                                                   | Curationis                                                                                 | English | Observational | UNISA. Universidade Santo Amaro                                                           | Brasil      | Tropical Latin America    | Middle SDI |
| (Linden et al, 2012)   | Attitudes of qualified vs. student mental health nurses towards an individual diagnosed with schizophrenia                                              | Journal of advanced nursing                                                                | English | Observational | Queen's University of Belfast. School of Nursing & Midwifery                              | UK, Ireland | Western Europe            | High SDI   |
| (Madianos et al, 2005) | Nursing students' attitude change towards mental illness and psychiatric case recognition after a clerkship in psychiatry.                              | Issues in mental health nursing                                                            | English | Observational | University of Athens. School of Health Sciences, Faculty of Nursing                       | Greece      | Western Europe            | High SDI   |
| (Malla et al, 1987)    | Attitudes towards mental illness: the influence of education and experience.                                                                            | The International journal of social psychiatry                                             | English | Observational | ACCESS Open Minds/Esprits Ouverts,                                                        | Canada      | High-income North America | High SDI   |
| (Markham et al, 2003)  | The effects of the psychiatric label 'borderline personality disorder' on nursing staffs perceptions and causal attributions for challenging behaviours | British journal of clinical psychology                                                     | English | Observational | Psychology Department, South Warwickshire Primary Care Trust and University of Birmingham | UK, England | Western Europe            | High SDI   |

|                                 |                                                                                                                                                |                                                  |         |               |                                                                                                           |              |                             |            |
|---------------------------------|------------------------------------------------------------------------------------------------------------------------------------------------|--------------------------------------------------|---------|---------------|-----------------------------------------------------------------------------------------------------------|--------------|-----------------------------|------------|
| (Martensson et al, 2014)        | Mental health nursing staff's attitudes towards mental illness: an analysis of related factors                                                 | Journal of psychiatric and mental health nursing | English | Observational | University of Gävle. Faculty of Health and Occupational Studies, Department of Health and Caring Sciences | Sweden       | Western Europe              | High SDI   |
| (Martin et al, 2019)            | Attitudes to psychiatry and to mental illness among nursing students: Adaptation and use of two validated instruments in preclinical education | Journal of psychiatric and mental health nursing | English | Observational | Child Study Center, Yale School of Medicine                                                               | USA          | High-income North America   | High SDI   |
| (Martinez-Martinez et al, 2019) | Effectiveness of direct contact intervention with people with mental illness to reduce stigma in nursing students                              | International journal of mental health nursing   | English | Intervention  | Universidad Europea de Valencia. Faculty of Health Sciences, Department of Nursing and Physiotherapy,     | Spain        | Western Europe              | High SDI   |
| (Mason et al, 2010)             | Forensic nurses' perceptions of labels of mental illness and personality disorder: clinical versus management issues                           | Journal of psychiatric and mental health nursing | English | Observational | University of Chester. Faculty of Health and Social Care                                                  | UK, England  | Western Europe              | High SDI   |
| (Mavundla et al, 1997)          | The attitudes of nurses towards mentally ill people in a general hospital setting in Durban.                                                   | Curationis                                       | English | Observational | University of Transkei. Department of Nursing Science                                                     | South Africa | Southern sub-Saharan Africa | Middle SDI |
| (Mavundla, 2000)                | Professional nurses' perception of nursing mentally ill people in a general hospital setting                                                   | Journal of advanced nursing                      | English | Observational | Centre for Institutional Excellence and Research, Technikon SA                                            | South Africa | Southern sub-Saharan Africa | Middle SDI |
| (McCarthy et al, 1973)          | Nurses attitudes and expectations toward psychiatric patients with multiple readmissions                                                       | Nursing research                                 | English | Observational | Boston City Hospital School of Nursing                                                                    | USA          | High-income North America   | High SDI   |
| (McConachie et al, 2009)        | Mental health nurses' attitudes towards severe perinatal mental illness                                                                        | Journal of advanced nursing                      | English | Observational | NHS Forth Valley. Department of Liaison Psychiatry                                                        | UK, Scotland | Western Europe              | High SDI   |

|                        |                                                                                                                                            |                                                           |         |               |                                                                                                 |             |                           |                |
|------------------------|--------------------------------------------------------------------------------------------------------------------------------------------|-----------------------------------------------------------|---------|---------------|-------------------------------------------------------------------------------------------------|-------------|---------------------------|----------------|
| (McLaughli, 1997)      | The effect of classroom theory and contact with patients on the attitudes of student nurses towards mentally ill people                    | Journal of advanced nursing                               | English | Observational | Western Area College of Nursing, Multi-Disciplinary Education Centre, Altnagelvin Area Hospital | UK, Ireland | Western Europe            | High SDI       |
| (Moore et al, 1978)    | Intercorrelations among factors in opinions about mental-illness scale in scores of non-psychiatric nurses - comparison with other studies | Psychological reports                                     | English | Observational | Wayne State University, College of Nursing                                                      | USA         | High-income North America | High SDI       |
| (Morgan, 2016)         | No Right Place to Die: Nursing Attitudes and Needs in Caring for People With Serious Mental Illness at End-of-Life                         | Journal of the american psychiatric nurses association    | English | Observational | University of Massachusetts                                                                     | USA         | High-income North America | High SDI       |
| (Morrison et al, 1976) | The attitudes of nursing students and others about mental illness.                                                                         | Journal of psychiatric nursing and mental health services | English | Observational | Albany Medical College                                                                          | USA         | High-income North America | High SDI       |
| (Morrison, 2009)       | Using an adapted reflecting team approach to learn about mental health and illness with general nursing students: An Australian example    | International journal of mental health nursing            | English | Intervention  | University of Canberra. Healthpact Research Centre for Health Promotion and Wellbeing, , ACT    | Australia   | Australasia               | High SDI       |
| (Mukesh et al, 2017)   | Attitude towards mental illness among staff nurses in a tertiary care hospital-a hospital-based cross-sectional study                      | Journal of evolution of medical and dental sciences-jemds | English | Observational | Department of Psychiatry, Academy of Medical Sciences, Pariyaram, Kannur                        | India       | South Asia                | Low-middle SDI |
| (Munro et al, 2007)    | Surveying the attitudes of acute mental health nurses                                                                                      | Journal of psychiatric and mental health nursing          | English | Observational | The University of Manchester                                                                    | UK, England | Western Europe            | High SDI       |

|                                  |                                                                                                                                                             |                                                  |         |               |                                                                           |          |                            |                |
|----------------------------------|-------------------------------------------------------------------------------------------------------------------------------------------------------------|--------------------------------------------------|---------|---------------|---------------------------------------------------------------------------|----------|----------------------------|----------------|
| (Napoletano, 1981)               | Correlates of change in attitudes toward mental-illness among vocational nursing-students                                                                   | Psychological reports                            | English | Observational | University of Colorado                                                    | USA      | High-income North America  | High SDI       |
| (Ng et al, 2017)                 | Determining the effectiveness of a video-based contact intervention in improving attitudes of Penang primary care nurses towards people with mental illness | Plos one                                         | English | Intervention  | Department of Psychiatry, Penang Medical College                          | Malaysia | Southeast Asia             | Middle SDI     |
| (Ng, et al, 2010)                | Growing practice specialists in mental health: addressing stigma and recruitment with a nursing residency program.                                          | Nursing leadership                               | English | Intervention  | Principal, Vision & Results Inc.                                          | Canada   | High-income North America  | High SDI       |
| (Nilsen et al, 2013)             | Identifying Medical-Surgical Nursing Staff Perceptions of the Drug-Abusing Patient                                                                          | Journal of addictions nursing                    | English | Observational | Naval Medical Center San Diego                                            | USA      | High-income North America  | High SDI       |
| (O'Ferrall-Gonzalez et al, 2019) | Factors associated with the evolution of attitudes towards mental illness in a cohort of nursing students                                                   | Journal of psychiatric and mental health nursing | English | Observational | Department of Nursing and Physiotherapy, University of Cádiz              | Spain    | Western Europe             | High SDI       |
| (Olade, 1979)                    | Attitudes towards mental-illness - comparison of post-basic nursing-students with science students                                                          | Journal of advanced nursing                      | English | Observational | University of Ibadan. College of Medicine, Department of Nursing          | Nigeria  | Western sub-Saharan Africa | Low-middle SDI |
| (Olade, 1983)                    | Attitudes towards mental-illness - effect of integration of mental-health concepts into a postbasic nursing degree program                                  | Journal of advanced nursing                      | English | Observational | University of Ibadan. College of Medicine, Department of Nursing          | Nigeria  | Western sub-Saharan Africa | Low-middle SDI |
| (Ordan et al, 1974)              | Nurses' professional stigma and attitudes towards postpartum women with severe mental illness                                                               | Journal of clinical nursing                      | English | Observational | Henrietta Szold/Hadassah-Hebrew University. School of Nursing, Faculty of | Israel   | Western Europe             | High SDI       |

| Medicine                  |                                                                                                                |                                                  |            |               |                                                                                                                             |             |                           |                 |
|---------------------------|----------------------------------------------------------------------------------------------------------------|--------------------------------------------------|------------|---------------|-----------------------------------------------------------------------------------------------------------------------------|-------------|---------------------------|-----------------|
| (Park et al, 2015)        | Knowledge and Attitude of 851 Nursing Personnel toward Depression in General Hospitals of Korea                | Journal of korean medical science                | English    | Observational | Department of Psychiatry, Yong-In Mental Hospital                                                                           | South Korea | High-income Asia Pacific  | High SDI        |
| (Parra López et al, 2017) | Effects of clinical experience in the nursing student attitudes toward people with psychiatric disabilities    | Ciencia y enfermería                             | Spanish    | Intervention  | Universidad Andrés Bello. Concepción. Enfermera, Mag. en Investigación Social y Desarrollo. Docente Facultad de Enfermería, | Chile       | Southern Latin America    | High-middle SDI |
| (Perlman et al, 2019)     | Stigmatization Behavior of Pre-Registration Nurses: Do the Self-Determined Psychological Needs Influence This? | Issues in mental health nursing                  | English    | Observational | University of Wollongong, School of Education                                                                               | Australia   | Australasia               | High SDI        |
| (Peterson, 2017)          | Experiencing stigma as a nurse with mental illness                                                             | Journal of psychiatric and mental health nursing | English    | Observational | Coast Mental Health, Rehabilitation & Recovery Program, Coquitlam                                                           | Canada      | High-income North America | High SDI        |
| (Phillips et al, 2019)    | Practices and Attitudes of Nursing Students Toward Patients With Disordered Eating Behaviors.                  | Nursing education perspectives                   | Portuguese | Observational | Fairfield University. Egan School of Nursing and Health Studies                                                             | Portugal    | Western Europe            | High SDI        |
| (Pinto-Foltz, 2009)       | Reducing Stigma Related to Mental Disorders: Initiatives, Interventions, and Recommendations for Nursing       | Archives of psychiatric nursing                  | English    | Review        | University of Louisville. School of Nursing                                                                                 | USA         | High-income North America | High SDI        |

|                                 |                                                                                                                                            |                                                                   |         |               |                                                                                                                      |             |                           |                |
|---------------------------------|--------------------------------------------------------------------------------------------------------------------------------------------|-------------------------------------------------------------------|---------|---------------|----------------------------------------------------------------------------------------------------------------------|-------------|---------------------------|----------------|
| (Poreddi et al, 2014)           | Undergraduate Nursing Students' Attitudes towards Mental Illness: Implications for Specific Academic Education.                            | Indian journal of psychological medicine                          | English | Observational | Deemed University. Department of Nursing, College of Nursing, National Institute of Mental Health and Neuro Sciences | India       | South Asia                | Low-middle SDI |
| (Poreddi et al, 2015)           | Bachelor of nursing student' attitude towards people with mental illness and career choices in psychiatric nursing. An Indian perspective. | Investigacion y educacion en enfermeria                           | English | Observational | Deemed University. Department of Nursing, National Institute of Mental health and Neurosciences                      | India       | South Asia                | Low-middle SDI |
| (Poreddi et al, 2017)           | Medical and nursing students' attitudes toward mental illness: An Indian perspective.                                                      | Investigacion y educacion en enfermeria                           | English | Observational | Deemed University. Department of Nursing, National Institute of Mental health and Neurosciences                      | India       | South Asia                | Low-middle SDI |
| (Reed et al, 2005)              | The mixed attitudes of nurse's to caring for people with mental illness in a rural general hospital                                        | International journal of mental health nursing                    | English | Observational | Maldon Hospital                                                                                                      | Australia   | Australasia               | High SDI       |
| (Robinson, 1973)                | Registered and student psychiatric nurses opinions about mental-illness                                                                    | New zealand medical journal                                       | English | Observational | Oakley Hosp,Mental Hlth Res Fdn,Auckland                                                                             | New Zealand | Australasia               | High SDI       |
| (Rodriguez-Almagro et al, 2019) | Level of Stigma among Spanish Nursing Students toward Mental Illness and Associated Factors: A Mixed-Methods Study                         | International journal of environmental research and public health | English | Observational | University of Castilla-La Mancha. Department of Nursing, Ciudad Real Nursing Faculty                                 | Spain       | Western Europe            | High SDI       |
| (Ross et al, 2009)              | Stigma, negative attitudes and discrimination towards mental illness within the nursing profession: a review of the literature             | Journal of psychiatric and mental health nursing                  | English | Review        | Douglas College, BSN Program, Faculty of Health Sciences                                                             | Canada      | High-income North America | High SDI       |

|                       |                                                                                                                                   |                                                |         |               |                                                                                      |             |                            |            |
|-----------------------|-----------------------------------------------------------------------------------------------------------------------------------|------------------------------------------------|---------|---------------|--------------------------------------------------------------------------------------|-------------|----------------------------|------------|
| (Rydon, 2005)         | The attitudes, knowledge and skills needed in mental health nurses: The perspective of users of mental health services            | International journal of mental health nursing | English | Observational | Massey University. School of Health Sciences, Albany Campus,                         | New Zealand | Australasia                | High SDI   |
| (Sahile et al, 2019)  | Primary health care nurses attitude towards people with severe mental disorders in Addis Ababa, Ethiopia: a cross sectional study | International journal of mental health systems | English | Observational | Amanuel Mental Specialized Hospital, Addis Ababa                                     | Ethiopia    | Eastern sub-Saharan Africa | Low SDI    |
| (Samari et al, 2018)  | Stigma towards people with mental disorders: Perspectives of nursing students                                                     | Archives of psychiatric nursing                | English | Observational | Research Division, Institute of Mental Health                                        | Singapore   | High-income Asia Pacific   | High SDI   |
| (Samari et al, 2019)  | Attitudes towards psychiatry amongst medical and nursing students in Singapore                                                    | Bmc medical education                          | English | Observational | Research Division, Institute of Mental Health, Buangkok Green Medical Park           | Singapore   | High-income Asia Pacific   | High SDI   |
| (Sari et al, 2018)    | Investigation of attitudes toward mental illness among nursing students in Indonesia                                              | International journal of nursing sciences      | English | Observational | Diponegoro University. School of Nursing, Faculty of Medicine                        | Indonesia   | Southeast Asia             | Middle SDI |
| (Schafer et al, 2011) | A survey into student nurses' attitudes towards mental illness: Implications for nurse training                                   | nurse education today                          | English | Observational | Anglia Ruskin Univ, Chelmsford                                                       | UK, England | Western Europe             | High SDI   |
| (Seo Moon-sook, 2017) | A Subjectivity Study on the Attitudes toward Mental Disorders of Nursing Students                                                 | The Journal of Korean Nursing Research         | Korean  | Observational | McMaster University. Department of Health Reserach Methods Evidence and Impact (HEI) | Canada      | High-income North America  | High SDI   |

|                        |                                                                                                                                                                             |                                            |         |               |                                                                            |             |                           |          |
|------------------------|-----------------------------------------------------------------------------------------------------------------------------------------------------------------------------|--------------------------------------------|---------|---------------|----------------------------------------------------------------------------|-------------|---------------------------|----------|
| (Sercu et al, 2015)    | How does stigma influence mental health nursing identities? An ethnographic study of the meaning of stigma for nursing role identities in two Belgian Psychiatric Hospitals | International journal of nursing studies   | English | Observational | Ghent University. Department of Sociology, Research Foundation (FWO)       | Belgium     | Western Europe            | High SDI |
| (Shahif et al, 2019)   | Knowledge and attitude towards mental illness among primary healthcare nurses in Brunei: A cross-sectional study                                                            | Asian journal of psychiatry                | English | Observational | University of Brunei Darussalam. PAPRSB Institute of Health Science        | Brunei      | High-income Asia Pacific  | High SDI |
| (Shattell et al, 2006) | She took the time to make sure she understood: Mental health patients' experiences of being understood                                                                      | Archives of psychiatric nursing            | English | Observational | University of North Carolina at Greensboro. School of Nursing              | USA         | High-income North America | High SDI |
| (Sherwood, 2019)       | Healthcare curriculum influences on stigma towards mental illness: Core psychiatry course impact on pharmacy, nursing and social work student attitudes                     | Currents in pharmacy teaching and learning | English | Observational | University of New England. College of Pharmacy                             | USA         | High-income North America | High SDI |
| (Slemon et al, 2019)   | Undergraduate students' perspectives on pursuing a career in mental health nursing following practicum experience                                                           | Journal of clinical nursing                | English | Observational | University of British Columbia. School of Nursing                          | Canada      | High-income North America | High SDI |
| (Slimmer et al, 1990)  | Effect of psychiatric clinical learning site on nursing students' attitudes toward mental illness and psychiatric nursing.                                                  | The Journal of nursing education           | English | Intervention  | University of Illinois System                                              | USA         | High-income North America | High SDI |
| (Smith, 1977)          | Attitudes of student psychiatric nurses towards mental illness.                                                                                                             | Nursing times                              | English | Observational | City University. Research Fellow, Department of Mental Health and Learning | UK, England | Western Europe            | High SDI |



| Disability Nursing     |                                                                                                                                                |                                                                    |         |               |                                                                                     |             |                          |                |
|------------------------|------------------------------------------------------------------------------------------------------------------------------------------------|--------------------------------------------------------------------|---------|---------------|-------------------------------------------------------------------------------------|-------------|--------------------------|----------------|
| (Smyth et al, 1971)    | Effects of nursing training on attitudes toward psychiatric patients                                                                           | Psychological reports                                              | English | Observational | University of Tokyo. Graduate School of Arts and Sciences                           | Japan       | High-income Asia Pacific | High SDI       |
| (Song et al, 2016)     | Experience Process of Reducing Prejudices against People with Mental Illness by Nursing Students during Clinical Training in Psychiatric Wards | Journal of Korean Academy of Psychiatric and Mental Health Nursing | Korean  | Observational | National Naju Hospital                                                              | South Korea | High-income Asia Pacific | High SDI       |
| (Song, 2015)           | The Nursing Students' Experience of Psychiatric Practice in South Korea                                                                        | Archives of psychiatric nursing                                    | English | Observational | Wonkwang University. Department of Nursing, Center for Animal Resources Development | South Korea | High-income Asia Pacific | High SDI       |
| (Soyoung et al, 2016)  | Social Distance Attitudes of Nursing Students towards Adults with Mental Disorders                                                             | Journal of Korean Academy of Psychiatric and Mental Health Nursing | Korean  | Observational | Kyung Hee University.College of Nursing Science                                     | South Korea | High-income Asia Pacific | High SDI       |
| (Sreeraj et al, 2017)  | Indian nursing students' attitudes toward mental illness and persons with mental illness.                                                      | Industrial psychiatry journal                                      | English | Observational | Department of Psychiatry, National Institute of Mental Health and Neurosciences     | India       | South Asia               | Low-middle SDI |
| (Sreevani et al, 2012) | Assessment of the attitude of staff nurses towards hospitalised psychiatric patients in Kolar (Karnataka).                                     | The Nursing journal of India                                       | English | Observational | Reade, Centre for Rehabilitation and Rheumatology                                   | Netherlands | Western Europe           | High SDI       |

|                           |                                                                                                                                                                              |                                                  |         |               |                                                                                           |             |                           |                 |
|---------------------------|------------------------------------------------------------------------------------------------------------------------------------------------------------------------------|--------------------------------------------------|---------|---------------|-------------------------------------------------------------------------------------------|-------------|---------------------------|-----------------|
| (Stacey et al, 2018)      | A focus group study exploring student nurse's experiences of an educational intervention focused on working with people with a diagnosis of personality disorder             | Journal of psychiatric and mental health nursing | English | Intervention  | University of Nottingham. School of Health Sciences, Royal Derby Hospital                 | UK, England | Western Europe            | High SDI        |
| (Stewart et al, 2015)     | Thematic analysis of psychiatric patients' perceptions of nursing staff                                                                                                      | International journal of mental health nursing   | English | Observational | Kings College. Institute of Psychiatry                                                    | UK, England | Western Europe            | High SDI        |
| (Stone, 1966)             | Change in nursing students expectations regarding mental patients                                                                                                            | Nursing research                                 | English | Observational | University of North Dakota. Department of Community Medicine,                             | USA         | High-income North America | High SDI        |
| (Stuhlmiller et al, 2019) | Understanding the impact of mental health placements on student nurses' attitudes towards mental illness                                                                     | Nurse education in practice                      | English | Observational | University at Buffalo, School of Nursing                                                  | USA         | High-income North America | High SDI        |
| (Sun et al, 2014)         | Attitudes towards people with mental illness among psychiatrists, psychiatric nurses, involved family members and the general population in a large city in Guangzhou, China | International journal of mental health systems   | English | Observational | Guangzhou Psychiatric Hospital. Neuropsychiatric Research Institute                       | China       | East Asia                 | High-middle SDI |
| (Surgenor et al, 2005)    | Nursing student attitudes to psychiatric nursing and psychiatric disorders in New Zealand                                                                                    | International journal of mental health nursing   | English | Observational | Department of Psychological Medicine, Christchurch School of Medicine and Health Sciences | New Zealand | Australasia               | High SDI        |
| (Swain et al, 1973)       | Nursing students attitudes toward mental illness                                                                                                                             | Nursing research                                 | English | Observational | Univ Wisconsin,Sch Nursing                                                                | USA         | High-income North America | High SDI        |

|                             |                                                                                                                                                              |                                                            |         |               |                                                                                                              |             |                              |                |
|-----------------------------|--------------------------------------------------------------------------------------------------------------------------------------------------------------|------------------------------------------------------------|---------|---------------|--------------------------------------------------------------------------------------------------------------|-------------|------------------------------|----------------|
| (Tay et al, 1976)           | Nurses' attitudes toward people with mental illnesses in a psychiatric hospital in Singapore.                                                                | Journal of psychosocial nursing and mental health services | English | Observational | Nursing Department, Institute of Mental Health, Woodbridge Hospital                                          | Singapore   | High-income Asia Pacific     | High SDI       |
| (Tei-Tominaga et al, 2014)  | Stigma towards nurses with mental illnesses: A study of nurses and nurse managers in hospitals in Japan                                                      | International journal of mental health nursing             | English | Observational | Kyoto Tachibana University. Faculty of Nursing                                                               | Japan       | High-income Asia Pacific     | High SDI       |
| (Thongpriwan et al, 2015)   | Undergraduate nursing students' attitudes toward mental health nursing                                                                                       | Nurse education today                                      | English | Observational | University of Wisconsin-Milwaukee                                                                            | USA         | High-income North America    | High SDI       |
| (Vaghee et al, 2017)        | Comparing the Effect of Contact-based Education with Acceptance and Commitment Training on Destigmatization Toward Psychiatric Disorders in Nursing Students | Iranian journal of psychiatry and behavioral sciences      | English | Intervention  | Mashhad University of Medical Sciences. School of Nursing and Midwifery, Evidence Based Care Research Centre | Iran        | North Africa and Middle East | Middle SDI     |
| (van der Kluit et al, 2011) | Factors influencing attitudes of nurses in general health care toward patients with comorbid mental illness: an integrative literature review.               | Issues in mental health nursing                            | English | Review        | Reade, Centre for Rehabilitation and Rheumatology                                                            | Netherlands | Western Europe               | High SDI       |
| (Vijayalakshmi et al, 2013) | Attitudes of undergraduates towards mental illness: A comparison between nursing and business management students in India                                   | South african journal of psychiatry                        | English | Observational | National Institute of Mental Health and Neuro Sciences                                                       | India       | South Asia                   | Low-middle SDI |

|                        |                                                                                                                                                               |                                                            |         |               |                                                                                              |             |                           |          |
|------------------------|---------------------------------------------------------------------------------------------------------------------------------------------------------------|------------------------------------------------------------|---------|---------------|----------------------------------------------------------------------------------------------|-------------|---------------------------|----------|
| (Walsh, 1971)          | Instruction in psychiatric nursing, level of anxiety, and direction of attitude change toward mentally ill                                                    | Nursing research                                           | English | Observational | Natl League Nursing,Dept Baccalaureate & Higher Degree Programs                              | USA         | High-income North America | High SDI |
| (Weare et al, 2019)    | ICU nurses feel unprepared to care for patients with mental illness: A survey of nurses' attitudes, knowledge, and skills                                     | Intensive and critical care nursing                        | English | Observational | Peninsula Hlth, Dept Intens Care                                                             | Australia   | Australasia               | High SDI |
| (Webb et al, 2007)     | Nursing staff attitudes towards patients with personality disorder                                                                                            | Personality and mental health                              | English | Observational | Cardiff University. The Gwylfa Therapy Service, St Cadoc's Hospital and School of Psychology | UK, Wales   | Western Europe            | High SDI |
| (Webster, 2009)        | Addressing Nursing Students' Stigmatizing Beliefs Toward Mental Illness                                                                                       | Journal of psychosocial nursing and mental health services | English | Intervention  | Salisbury University Department of Nursing                                                   | USA         | High-income North America | High SDI |
| (Weller et al, 1988)   | Does contact with the mentally-ill affect nurses attitudes to mental-illness                                                                                  | British journal of medical psychology                      | English | Observational | Bar-Ilan University. Department of Sociology                                                 | Israel      | Western Europe            | High SDI |
| (Westwood et al, 2010) | Attitudes and perceptions of mental health nurses towards borderline personality disorder clients in acute mental health settings: a review of the literature | Journal of psychiatric and mental health nursing           | English | Review        | University of Manchester. Nursing Midwifery and Social Work                                  | UK, England | Western Europe            | High SDI |
| (Wilkinson, 1982)      | The effects of brief psychiatric-training on the attitudes of general nursing-students to psychiatric-patients                                                | Journal of advanced nursing                                | English | Intervention  | University of Kent. School of Psychology                                                     | UK, England | Western Europe            | High SDI |

|                        |                                                                                                                                                                                      |                                                  |         |               |                                                                                  |                |                          |                 |
|------------------------|--------------------------------------------------------------------------------------------------------------------------------------------------------------------------------------|--------------------------------------------------|---------|---------------|----------------------------------------------------------------------------------|----------------|--------------------------|-----------------|
| (Winkler et al, 2017)  | Short video interventions to reduce mental health stigma: a multi-centre randomised controlled trial in nursing high schools                                                         | Social psychiatry and psychiatric epidemiology   | English | Intervention  | Department of Social Psychiatry, National Institute of Mental Health             | Czech Republic | Central Europe           | High-middle SDI |
| (Yamauchi et al, 2011) | Effects of psychiatric training on nursing students' attitudes towards people with mental illness in Japan                                                                           | International journal of social psychiatry       | English | Observational | University of Tokyo. Graduate School of Arts and Sciences                        | Japan          | High-income Asia Pacific | High SDI        |
| (Yoon et al, 2007)     | A Study on the Difference of Practicum Satisfaction and Attitudes toward Mental Disorder between Nursing Students and Social Welfare Students Who Experienced Psychiatric Practicum. | Journal of Rehabilitation Research               | Korean  | Observational | Gyeongju University                                                              | South Korea    | High-income Asia Pacific | High SDI        |
| (Younghee, 2018)       | Effects of Mental health clinical practice on the attitude toward the mental illness, social distance, psychiatry nurses' image of Nursing Students                                  | Journal of the Korea Convergence Society         | Korean  | Observational | Kwangju Women's University. Dept. of Nursing                                     | South Korea    | High-income Asia Pacific | High SDI        |
| (Yuan, et al, 2018)    | Direct and moderating effects of personality on stigma towards mental illness                                                                                                        | BMC psychiatry                                   | English | Observational | Research Division, Institute of Mental Health                                    | Singapore      | High-income Asia Pacific | High SDI        |
| Harrison et al, 2017)  | Breaking down the stigma of mental health nursing: A qualitative study reflecting opinions from western australian nurses                                                            | Journal of psychiatric and mental health nursing | English | Observational | University of Western Australia, School of Psychiatry and Clinical Neurosciences | Australia      | Australasia              | High SDI        |

---

†GBD Regions; Global Burden of Disease Regions

†† Source: <http://ghdx.healthdata.org/record/ihme-data/gbd-2019-socio-demographic-index-sdi-1950-2019>

### Legend

| SDI quintile    | Lower bound | Upper bound |
|-----------------|-------------|-------------|
| Low SDI         | 0           | 0,454743    |
| Low-middle SDI  | 0,454743    | 0,607679    |
| Middle SDI      | 0,607679    | 0,689504    |
| High-middle SDI | 0,689504    | 0,805129    |
| High SDI        | 0,805129    | 1           |
